# Supplementary material for: Improved Risk Assessment by Integrating Molecular and Clinicopathological Factors in Early-stage Endometrial Cancer—Combined Analysis of the PORTEC Cohorts
Source: Oxford University Press journal article supplement (doi:10.1158/1078-0432.ccr-15-2878), 2016-03-22
Supplement: 10780432ccr152878-sup-158735_2_supp_3386372_k3grqf.docx [file 10780432ccr152878-sup-158735_2_supp_3386372_k3grqf.docx]

Supplementary Table 3.

|  | **p53 & MSI** | **p53 & *POLE*** | **MSI & *POLE*** | **p53 & MSI & *POLE*** | |
| --- | --- | --- | --- | --- | --- |
|  | **n=13** | **n=7** | **n=6** | **n=1** |  |
| **Age, years** |  |  |  |  |  |
| **Mean (range)** | 64 (52-73) | 62 (49-76) | 70 (61-79) | 74 (-) |  |
| ˂ 60 | 3 (23.1) | 4 (57.1) | 0 | 0 |  |
| 60-70 | 6 (46.1) | 0 | 3 (50.0) | 0 |  |
| ˃ 70 | 4 (30.8) | 3 (42.9) | 3 (50.0) | 1 |  |
| **Grade** |  |  |  |  |  |
| 1-2 | 10 (76.9) | 5 (71.4) | 5 (83.3) | 1 |  |
| 3 | 3 (23.1) | 2 (28.6) | 1 (16.7) | 0 |  |
| **Myometrial** **invasion** |  |  |  |  |  |
| <50% | 6 (46.1) | 2 (28.6) | 0 | 0 |  |
| >50% | 7 (53.9) | 5 (71.4) | 6 (100) | 1 |  |
| **LVSI** |  |  |  |  |  |
| Absent | 12 (92.3) | 7 (100) | 4 (66.7) | 1 |  |
| Substantial | 1 (7.7) | 0 | 2 (33.3) | 0 |  |
| **Risk** **group** |  |  |  |  |  |
| Low | 6 (46.1) | 4 (57.1) | 0 | 0 |  |
| High-intermediate | 6 (46.1) | 3 (42.9) | 5 (83.3) | 1 |  |
| High | 1 (7.7) | 0 | 1 (16.7) | 0 |  |
| **Treatment** |  |  |  |  |  |
| NAT | 3 (23.1) | 3 (42.9) | 0 | 1 |  |
| EBRT | 5 (38.4) | 4 (57.1) | 3 (50.0) | 0 |  |
| VBT | 5 (38.4) | 0 | 3 (50.0) | 0 |  |
| **Mutations** |  |  |  |  |  |
| *CDKN2A* | 1 (7.7) | 0 | 0 | 0 |  |
| *FBXW7* | 3 (23.1) | 3 (42.9) | 1 (16.7) | 0 |  |
| *KRAS* | 1 (7.7) | 0 | 0 | 0 |  |
| *PIK3CA* | 3 (23.1) | 4 (57.1) | 2 (33.3) | 1 |  |
| *PPP2R1a* | 1 (7.7) | 0 | 1 (16.7) | 0 |  |
| *PTEN* | 5 (38.4) | 6 (85.7) | 4 (30.8) | 1 |  |
| **Altered** **protein** **expression** | |  |  |  |  |
| >10% L1CAM | 1 (7.7) | 2 (28.6) | 1 (16.7) | 0 |  |
| <10% ER | 2 (18.2) | 2 (33.3) | 1 (16.7) | 0 |  |
| <10% PR | 3 (27.3) | 2 (28.6) | 1 (20.0) | 0 |  |
| loss/clonal ARID1a | 4 (30.8) | 1 (14.3) | 3 (50.0) | 0 |  |
| loss/ heterogeneous PTEN | 6 (46.1) | 3 (42.9) | 5 (83.3) | 0 |  |
| nuclear β-catenin | 2 (15.4) | 1 (14.3) | 2 (33.3) | 0 |  |
| **Survival** |  |  |  |  |  |
| Alive | 10 (76.9) | 7 (100) | 4 (66.7) | 0 |  |
| Dead | 3 (23.1) | 0 | 2 (33.3) | 1 |  |
| **Recurrence** |  |  |  |  |  |
| Locoregional | 0 | 0 | 1 (16.7) | 0 |  |
| Distant | 2 (15.4) | 0 | 1 (16.7) | 1 |  |
