# Supplementary material for: Improved Risk Assessment by Integrating Molecular and Clinicopathological Factors in Early-stage Endometrial Cancer—Combined Analysis of the PORTEC Cohorts
Source: Oxford University Press journal article supplement (doi:10.1158/1078-0432.ccr-15-2878), 2016-03-22
Supplement: 10780432ccr152878-sup-158735_2_supp_3386374_v3grqf.docx [file 10780432ccr152878-sup-158735_2_supp_3386374_v3grqf.docx]

Supplementary Table 5.

|  |  | **Locoregional Recurrence** | | | **Distant Recurrence** | | | **Overall Survival** | | |
| --- | --- | --- | --- | --- | --- | --- | --- | --- | --- | --- |
|  |  |  | **12 events** |  |  | **10 events** |  |  | **67 events** |  |
|  | **Total n** | **HR** | **95% CI** | ***P*-value** | **HR** | **95% CI** | ***P*-value** | **HR** | **95% CI** | ***P*-value** |
| **Age (continuous)** | 242 | 1.064 | 1.001-1.131 | 0.045 | 1.005 | 0.935-1.079 | 0.900 | 1.087 | 1.057-1.117 | 0.000 |
| **Grade** |  |  |  |  |  |  |  |  |  |  |
| 1-2 | 227 | 1 |  |  | 1 |  |  | 1 |  |  |
| 3 | 15 | 1.511 | 0.195-11.706 | 0.693 | 1.775 | 0.225-14.015 | 0.586 | 1.356 | 0.544-3.379 | 0.513 |
| **Myometrial invasion** |  |  |  |  |  |  |  |  |  |  |
| <50 | 189 | 1 |  |  | 1 |  |  | 1 |  |  |
| >50 | 53 | 0.305 | 0.039-2.366 | 0.256 | 0.880 | 0.187-4.143 | 0.871 | 0.763 | 0.416-1.399 | 0.382 |
| **LVSI** |  |  |  |  |  |  |  |  |  |  |
| Absent/mild | 234 | 1 |  |  | 1 |  |  | 1 |  |  |
| Substantial | 6 | - | - | 0.705 | - | - | 0.729 | - | - | 0.428 |
| **Given treatment** |  |  |  |  |  |  |  |  |  |  |
| NAT | 112 | 1 |  |  | 1 |  |  | 1 |  |  |
| EBRT | 111 | 0.098 | 0.012-0.762 | 0.026 | 2.022 | 0.506-8.084 | 0.319 | 1.067 | 0.651-1.751 | 0.796 |
| VBT | 19 | 0.681 | 0.086-5.400 | 0.716 | 2.017 | 0.210-19.404 | 0.544 | 1.722 | 0.592-5.011 | 0.318 |
| **Molecular subgroup** | |  |  |  |  |  |  |  |  |  |
| NSMP | 134 | 1 |  |  | 1 |  |  | 1 |  |  |
| p53 | 22 | 0.849 | 0.106-6.787 | 0.877 | 3.939 | 0.941-16.487 | 0.061 | 1.989 | 0.977-4.048 | 0.058 |
| MSI | 62 | 0.819 | 0.217-3.089 | 0.769 | 1.154 | 0.135-9.877 | 0.896 | 1.231 | 0.694-2.182 | 0.478 |
| *POLE* | 24 | - | - | 0.983 | 0.439 | 0.051-3.760 | 0.453 | 0.716 | 0.279-1.836 | 0.487 |
| ***CTNNB1*** |  |  |  |  |  |  |  |  |  |  |
| No mutation | 176 | 1 |  |  | 1 |  |  | 1 |  |  |
| Mutation | 53 | 1.664 | 0.501-5.527 | 0.406 | 2.579 | 0.693-9.606 | 0.158 | 0.909 | 0.502-1.646 | 0.753 |
| ***FBXW7*** |  |  |  |  |  |  |  |  |  |  |
| No mutation | 217 | 1 |  |  | 1 |  |  | 1 |  |  |
| Mutation | 12 | 1.563 | 0.201-12.131 | 0.669 | - | - | 0.634 | 0.443 | 0.108-1.818 | 0.259 |
| ***FGFR2*** |  |  |  |  |  |  |  |  |  |  |
| No mutation | 217 | 1 |  |  | 1 |  |  | 1 |  |  |
| Mutation | 12 | - | - | 0.589 | 2.442 | 0.305-19.539 | 0.400 | 1.236 | 0.445-3.434 | 0.685 |
| ***KRAS*** |  |  |  |  |  |  |  |  |  |  |
| No mutation | 183 | 1 |  |  | 1 |  |  | 1 |  |  |
| Mutation | 46 | 2.009 | 0.605-6.672 | 0.255 | 3.216 | 0.863-11.978 | 0.082 | 0.746 | 0.379-1.466 | 0.395 |
| ***NRAS*** |  |  |  |  |  |  |  |  |  |  |
| No mutation | 221 | 1 |  |  | 1 |  |  | 1 |  |  |
| Mutation | 8 | - | - | 0.671 | - | - | 0.718 | 1.998 | 0.725-5.506 | 0.181 |
| ***PIK3CA*** |  |  |  |  |  |  |  |  |  |  |
| No mutation | 157 | 1 |  |  | 1 |  |  | 1 |  |  |
| Mutation | 72 | 0.440 | 0.096-2.009 | 0.289 | 0.271 | 0.034-2.164 | 0.218 | 1.007 | 0.592-1.713 | 0.979 |
| ***PPP2R1A*** |  |  |  |  |  |  |  |  |  |  |
| No mutation | 223 | 1 |  |  | 1 |  |  | 1 |  |  |
| Mutation | 6 | - | - | 0.713 | 4.841 | 0.605-38.721 | 0.137 | 0.528 | 0.073-3.813 | 0.527 |
| ***PTEN*** |  |  |  |  |  |  |  |  |  |  |
| No mutation | 129 | 1 |  |  | 1 |  |  | 1 |  |  |
| Mutation | 100 | 0.628 | 0.189-2.087 | 0.448 | 0.643 | 0.161-2.572 | 0.533 | 0.751 | 0.452-1.247 | 0.268 |
| **L1CAM** |  |  |  |  |  |  |  |  |  |  |
| <10% | 208 | 1 |  |  | 1 |  |  | 1 |  |  |
| >10% | 8 | 10.722 | 2.211-52.000 | 0.003 | 10.494 | 2.107-52.263 | 0.004 | 4.167 | 1.765-9.835 | 0.001 |
| **ER** |  |  |  |  |  |  |  |  |  |  |
| >10% | 188 | 1 |  |  | 1 |  |  | 1 |  |  |
| <10% | 11 | 2.280 | 0.285-18.254 | 0.437 | 6.752 | 1.360-33.532 | 0.020 | 1.270 | 0.456-3.540 | 0.648 |
| **PR** |  |  |  |  |  |  |  |  |  |  |
| >10% | 184 | 1 |  |  | 1 |  |  | 1 |  |  |
| <10% | 20 | 1.259 | 0.157-10.071 | 0.828 | 3.365 | 0.679-16.681 | 0.137 | 1.897 | 0.929-3.874 | 0.079 |
| **ARID1a** |  |  |  |  |  |  |  |  |  |  |
| Positive | 122 | 1 |  |  | 1 |  |  | 1 |  |  |
| Loss/clonal | 82 | 0.417 | 0.087-2.008 | 0.276 | 1.508 | 0.377-6.029 | 0.562 | 0.980 | 0.579-1.659 | 0.940 |
| **PTEN** |  |  |  |  |  |  |  |  |  |  |
| Positive | 122 | 1 |  |  | 1 |  |  | 1 |  |  |
| Loss/heterogeneous | 86 | 1.818 | 0.488-6.774 | 0.373 | 0.460 | 0.093-2.281 | 0.342 | 1.023 | 0.604-1.735 | 0.931 |
| **β-catenin** |  |  |  |  |  |  |  |  |  |  |
| Membrane | 155 | 1 |  |  | 1 |  |  | 1 |  |  |
| Nuclear | 55 | 1.380 | 0.345-5.526 | 0.649 | 0.905 | 0.183-4.485 | 0.903 | 0.892 | 0.489-1.628 | 0.710 |
